# Supplementary material for: Magnetic and luminescent coordination networks based on imidazolium salts and lanthanides for sensitive ratiometric thermometry
Source: PubMed Central journal article supplement (PMC6244178; doi:10.3762/bjnano.9.259), 2018-10-30
Supplement: Beilstein_J_Nanotechnol-09-2775-s001.pdf [file Beilstein_J_Nanotechnol-09-2775-s001.pdf]

# Supporting Information

for

## **Magnetic and luminescent coordination networks based on imidazolium salts and lanthanides for sensitive ratiometric thermometry**

Pierre Farger<sup>1,#</sup>, Cédric Leuvrey<sup>1</sup>, Mathieu Gallart<sup>1</sup>, Pierre Gilliot<sup>1</sup>, Guillaume Rogez<sup>1</sup>, João Rocha<sup>2</sup>, Duarte Ananias<sup>2</sup>, Pierre Rabu<sup>\*1</sup> and Emilie Delahaye<sup>\*1</sup>

Address: <sup>1</sup>Institut de Physique et Chimie des Matériaux de Strasbourg, Université de Strasbourg, CNRS UMR 7504, F-67034 Strasbourg Cedex 2, France; <sup>2</sup>Department of Chemistry, CICECO, University of Aveiro, 3810-193 Aveiro, Portugal and <sup>#</sup>Current address: Laboratoire de Physique et Chimie des Nano-Objets, Institut National des Sciences Appliquées, 135 avenue de Ranguéil, 31077 Toulouse Cedex 4, France

Email: Emilie Delahaye\* - emilie.delahaye@ipcms.unistra.fr;

Pierre Rabu\* - pierre.rabu@ipcms.unistra.fr

\* Corresponding author

### **Additional experimental data**

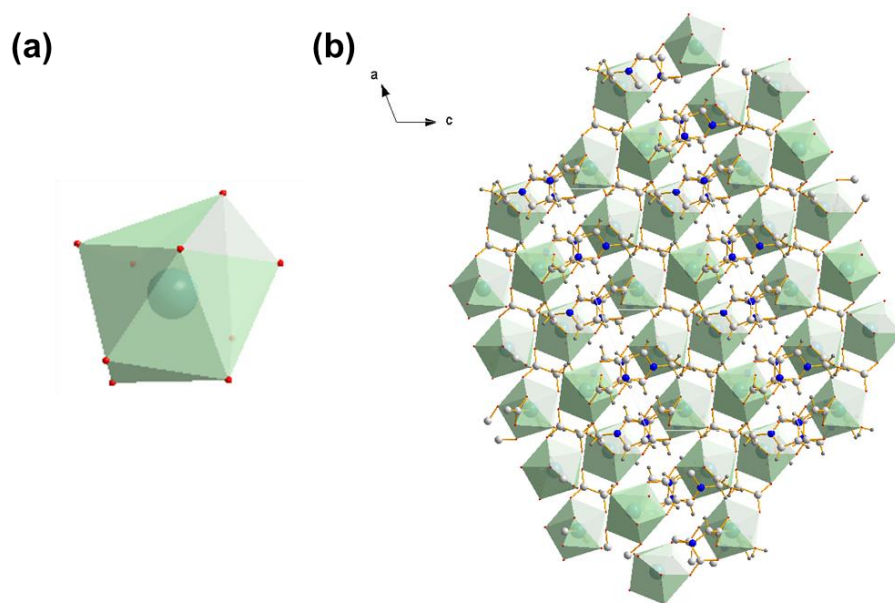

**Figure S1:** (a) Coordination polyhedron around the  $\text{Gd}^{3+}$  ion and (b) packing of these coordination polyhedra in the compound  $[\text{Gd}(\text{L})(\text{ox})(\text{H}_2\text{O})]$ .

**Table S1:** Selected bond lengths in Å for the  $[\text{Ln}(\text{L})(\text{ox})(\text{H}_2\text{O})]$  compounds with  $\text{Ln} = \text{Eu}^{3+}$ ,  $\text{Gd}^{3+}$ ,  $\text{Tb}^{3+}$ ,  $\text{Dy}^{3+}$ ,  $\text{Ho}^{3+}$  and  $\text{Yb}^{3+}$ .

|                           | $\text{Eu}^{3+}$ | $\text{Gd}^{3+}$ | $\text{Tb}^{3+}$ | $\text{Dy}^{3+}$ | $\text{Ho}^{3+}$ | $\text{Yb}^{3+}$ |
|---------------------------|------------------|------------------|------------------|------------------|------------------|------------------|
| Ln1–O1                    | 2.514(4)         | 2.542(3)         | 2.547(5)         | 2.459(4)         | 2.437(6)         | 2.405(8)         |
| Ln1–O2                    | 2.555(4)         | 2.486(3)         | 2.473(5)         | 2.522(4)         | 2.523(5)         | 2.494(7)         |
| Ln1–O3                    | 2.489(4)         | 2.504(3)         | 2.541(5)         | 2.477(4)         | 2.468(6)         | 2.413(8)         |
| Ln1–O4                    | 2.552(4)         | 2.551(3)         | 2.492(5)         | 2.528(4)         | 2.520(6)         | 2.334(7)         |
| Ln1–O5                    | 2.401(4)         | 2.419(3)         | 2.377(4)         | 2.390(4)         | 2.385(5)         | 2.314(7)         |
| Ln1–O6                    | 2.425(4)         | 2.384(3)         | 2.402(4)         | 2.351(4)         | 2.347(5)         | 2.354(8)         |
| Ln1–O7                    | 2.389(3)         | 2.392(3)         | 2.411(5)         | 2.394(4)         | 2.380(6)         | 2.299(8)         |
| Ln1–O8                    | 2.422(4)         | 2.415(3)         | 2.367(4)         | 2.358(4)         | 2.386(6)         | 2.332(8)         |
| Ln1–O9                    | 2.428(4)         | 2.396(3)         | 2.390(5)         | 2.366(4)         | 2.345(6)         | 2.519(9)         |
| Ln–O <sub>average</sub>   | 2.463            | 2.454            | 2.444            | 2.428            | 2.421            | 2.385            |
| Ln–Ln <sub>shortest</sub> | 6.21             | 6.19             | 6.17             | 6.13             | 6.12             | 6.04             |

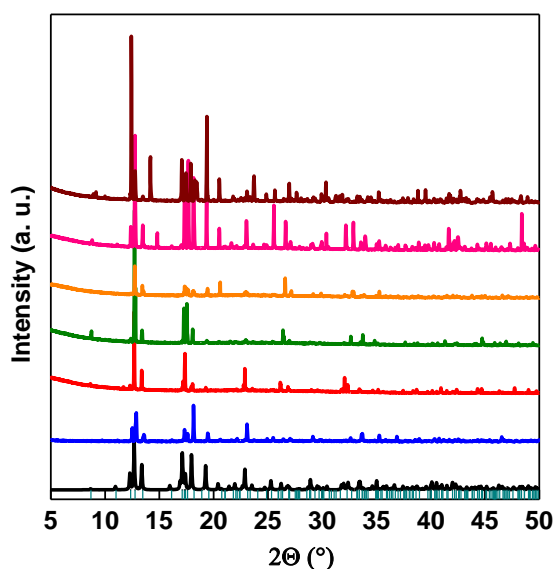

**Figure S2:** Comparison of the experimental powder X-ray diffraction patterns for the compounds  $[\text{Gd}(\text{L})(\text{ox})(\text{H}_2\text{O})]$  (blue line),  $[\text{Eu}(\text{L})(\text{ox})(\text{H}_2\text{O})]$  (red line),  $[\text{Tb}(\text{L})(\text{ox})(\text{H}_2\text{O})]$  (green line),  $[\text{Dy}(\text{L})(\text{ox})(\text{H}_2\text{O})]$  (orange line),  $[\text{Ho}(\text{L})(\text{ox})(\text{H}_2\text{O})]$  (pink line),  $[\text{Yb}(\text{L})(\text{ox})(\text{H}_2\text{O})]$  (brown line) and the simulated pattern from single crystals X-ray data of the compound  $[\text{Tb}(\text{L})(\text{ox})(\text{H}_2\text{O})]$  (black line). The green vertical lines indicate the position of the calculated diffraction lines.

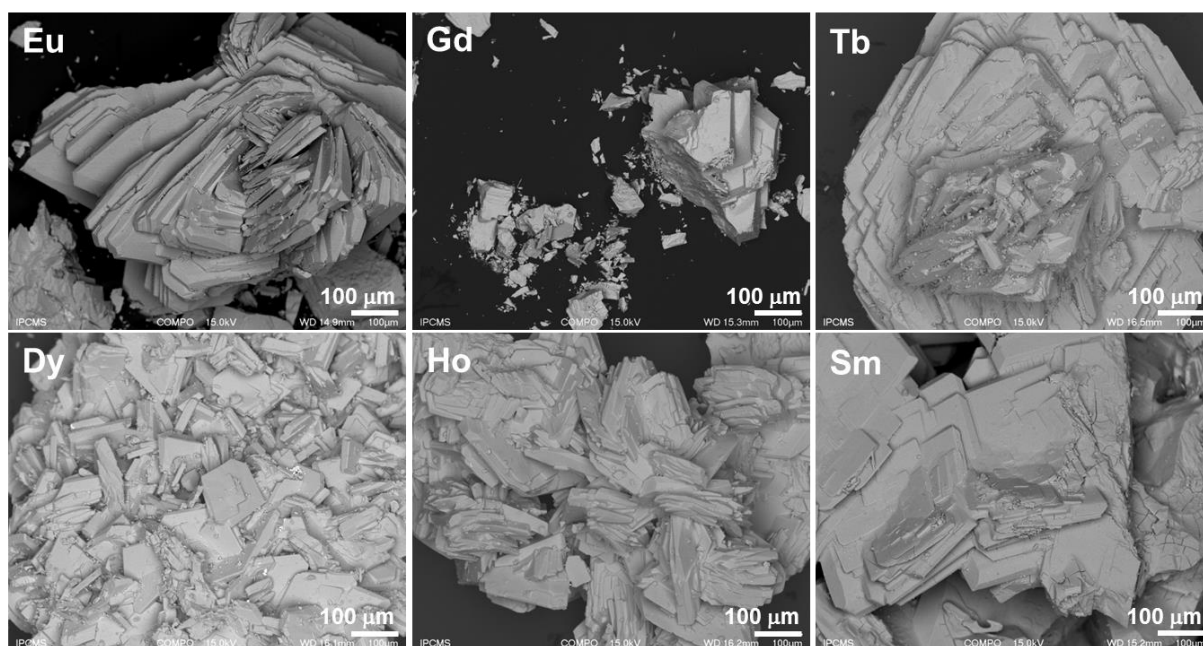

**Figure S3:** SEM images in composition of the  $[\text{Ln}(\text{L})(\text{ox})(\text{H}_2\text{O})]$  compounds with  $\text{Ln} = \text{Eu}^{3+}$ ,  $\text{Gd}^{3+}$ ,  $\text{Tb}^{3+}$ ,  $\text{Dy}^{3+}$ ,  $\text{Ho}^{3+}$  and  $\text{Yb}^{3+}$ .

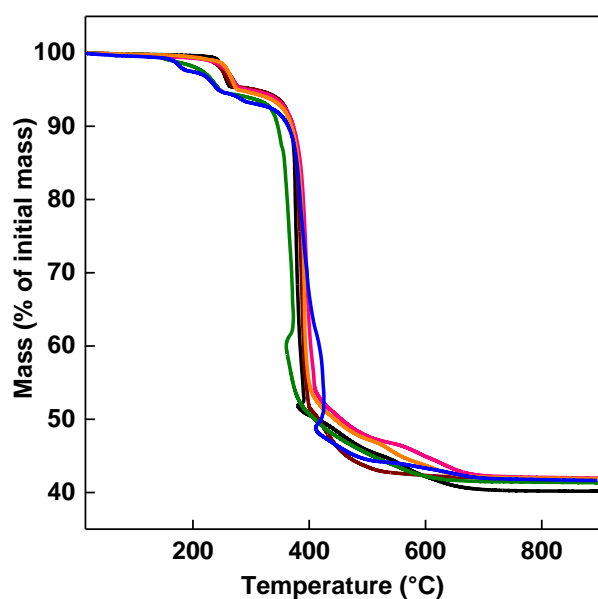

**Figure S4:** TGA curves of [Tb(L)(ox)(H<sub>2</sub>O)] (blue line), [Ho(L)(ox)(H<sub>2</sub>O)] (pink line), [Eu(L)(ox)(H<sub>2</sub>O)] (green line), [Dy(L)(ox)(H<sub>2</sub>O)] (red line), [Yb(L)(ox)(H<sub>2</sub>O)] (orange line), [Gd(L)(ox)(H<sub>2</sub>O)] (black line).

**Table S2:** Summary of the weight loss values for the [Ln(L)(ox)(H<sub>2</sub>O)] compounds with Ln = Eu<sup>3+</sup>, Gd<sup>3+</sup>, Tb<sup>3+</sup>, Dy<sup>3+</sup>, Ho<sup>3+</sup> and Yb<sup>3+</sup>.

|                                                                                    | Eu                             | Gd                             | Tb                             | Dy                             | Ho                             | Yb                             |
|------------------------------------------------------------------------------------|--------------------------------|--------------------------------|--------------------------------|--------------------------------|--------------------------------|--------------------------------|
| <b>step 1 : Elimination of water molecule</b>                                      |                                |                                |                                |                                |                                |                                |
| observed                                                                           | 5.80%                          | 4.85%                          | 4.80%                          | 5.25%                          | 5.05%                          | 5.40%                          |
| calculated                                                                         | 4.08%                          | 4.03%                          | 4.02%                          | 3.99%                          | 3.97%                          | 3.90%                          |
| <b>step 2 : combustion of organic moieties concomitant with formation of oxide</b> |                                |                                |                                |                                |                                |                                |
| observed                                                                           | 56.10%                         | 57.75%                         | 56.03%                         | 55.78%                         | 55.79%                         | 55.96%                         |
| calculated                                                                         | 58.40%                         | 57.67%                         | 57.45%                         | 56.98%                         | 56.66%                         | 55.62%                         |
| <b>final oxide</b>                                                                 | Eu <sub>2</sub> O <sub>3</sub> | Gd <sub>2</sub> O <sub>3</sub> | Tb <sub>2</sub> O <sub>3</sub> | Dy <sub>2</sub> O <sub>3</sub> | Ho <sub>2</sub> O <sub>3</sub> | Yb <sub>2</sub> O <sub>3</sub> |

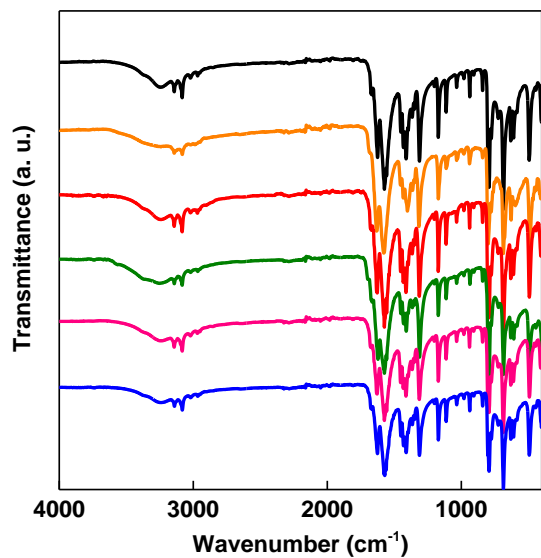

**Figure S5:** Infrared spectra of [Tb(L)(ox)(H<sub>2</sub>O)] (blue line), [Ho(L)(ox)(H<sub>2</sub>O)] (pink line), [Eu(L)(ox)(H<sub>2</sub>O)] (green line), [Dy(L)(ox)(H<sub>2</sub>O)] (red line), [Yb(L)(ox)(H<sub>2</sub>O)] (orange line), [Gd(L)(ox)(H<sub>2</sub>O)] (black line).

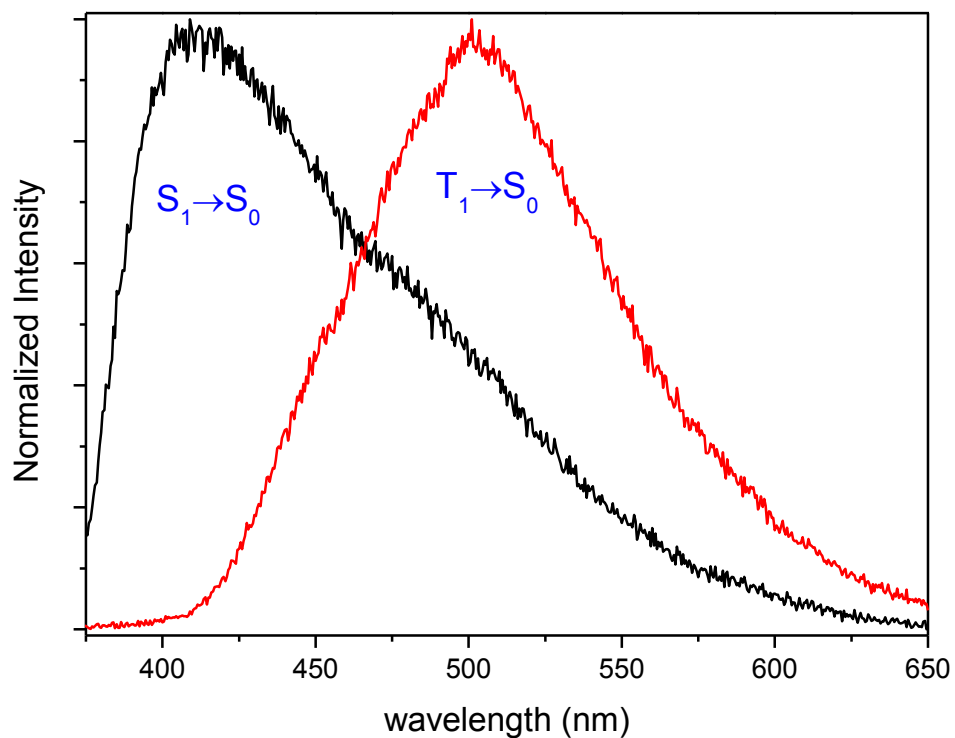

**Figure S6:** Time-resolved emission spectra of [Gd(L)(ox)(H<sub>2</sub>O)] measured at 12 K with 350 nm excitation. Black line: initial delay of 0.01 ms and integration time of 0.2 ms; red line: initial delay of 0.2 ms and integration time of 10 ms. Time-resolved emission spectra were not corrected for detection and optical spectral response of the spectrofluorometer.

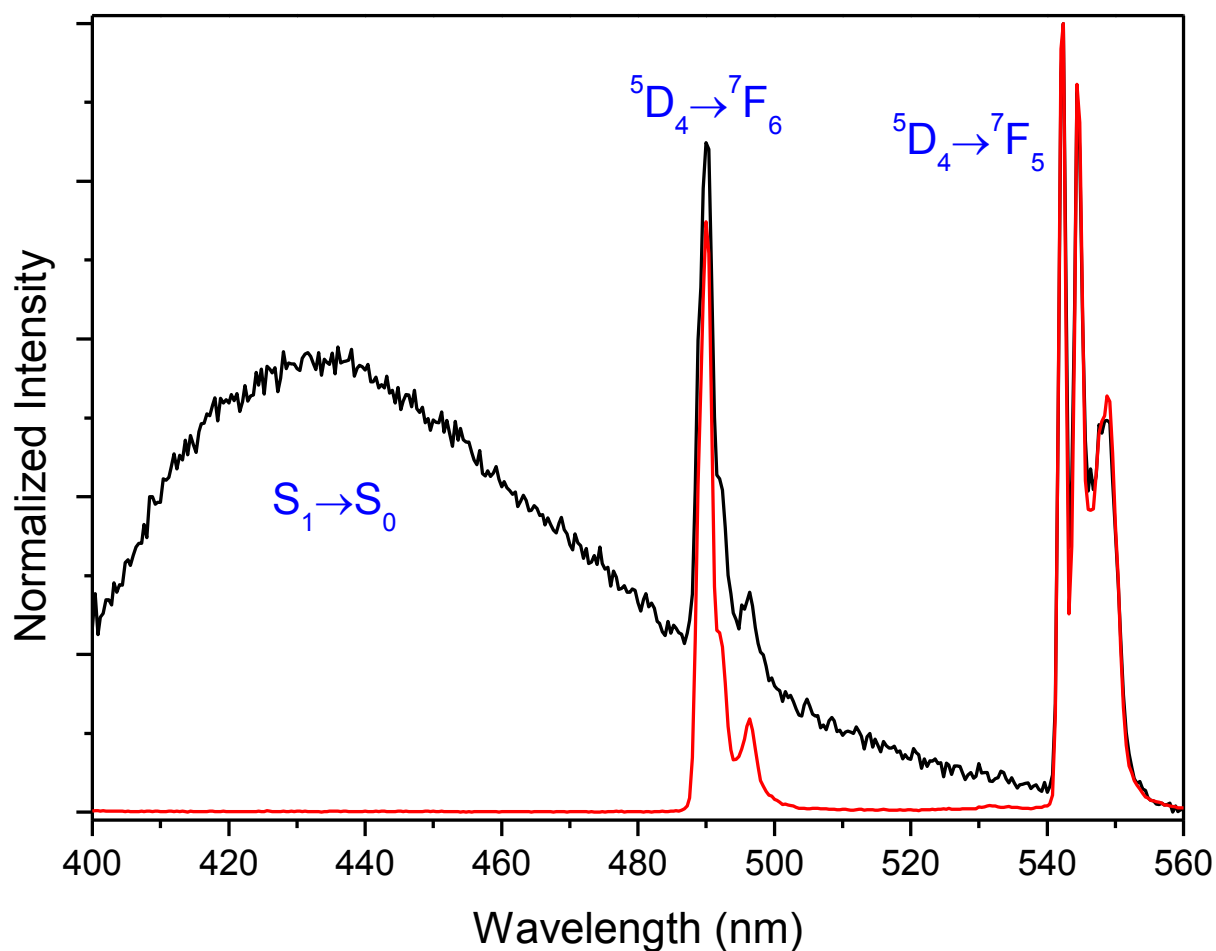

**Figure S7:** Selected region of the 12 K time-resolved emission spectra of [Tb(L)(ox)(H<sub>2</sub>O)] measured with 364 nm excitation. Black line: initial delay of 0.01 ms and integration time of 0.1 ms; red line: initial delay of 0.05 ms and integration time of 5 ms. Time-resolved emission spectra were not corrected for detection and optical spectral response of the spectrofluorometer.

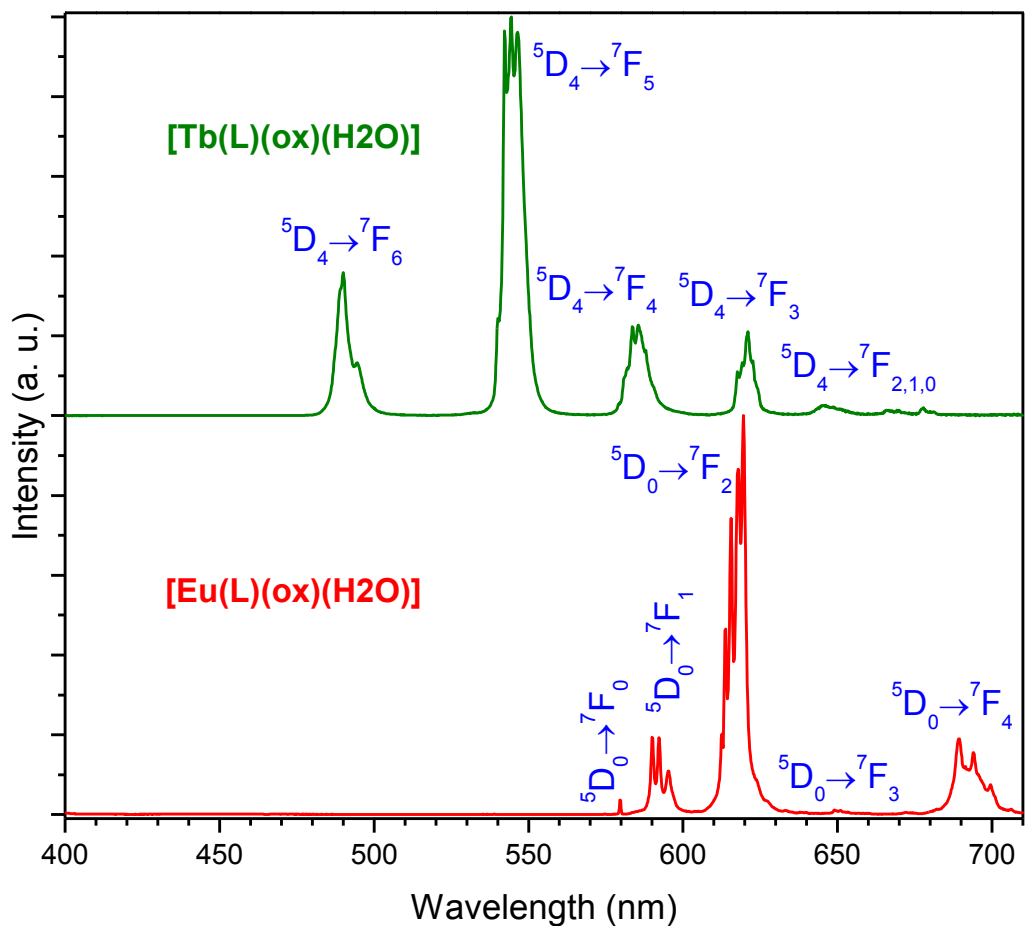

**Figure S8:** Emission spectra of  $[\text{Eu}(\text{L})(\text{ox})(\text{H}_2\text{O})]$  (red line;  $\lambda_{\text{Exc}} = 395$  nm) and  $[\text{Tb}(\text{L})(\text{ox})(\text{H}_2\text{O})]$  (green line;  $\lambda_{\text{Exc}} = 270$  nm) recorded at 297 K.



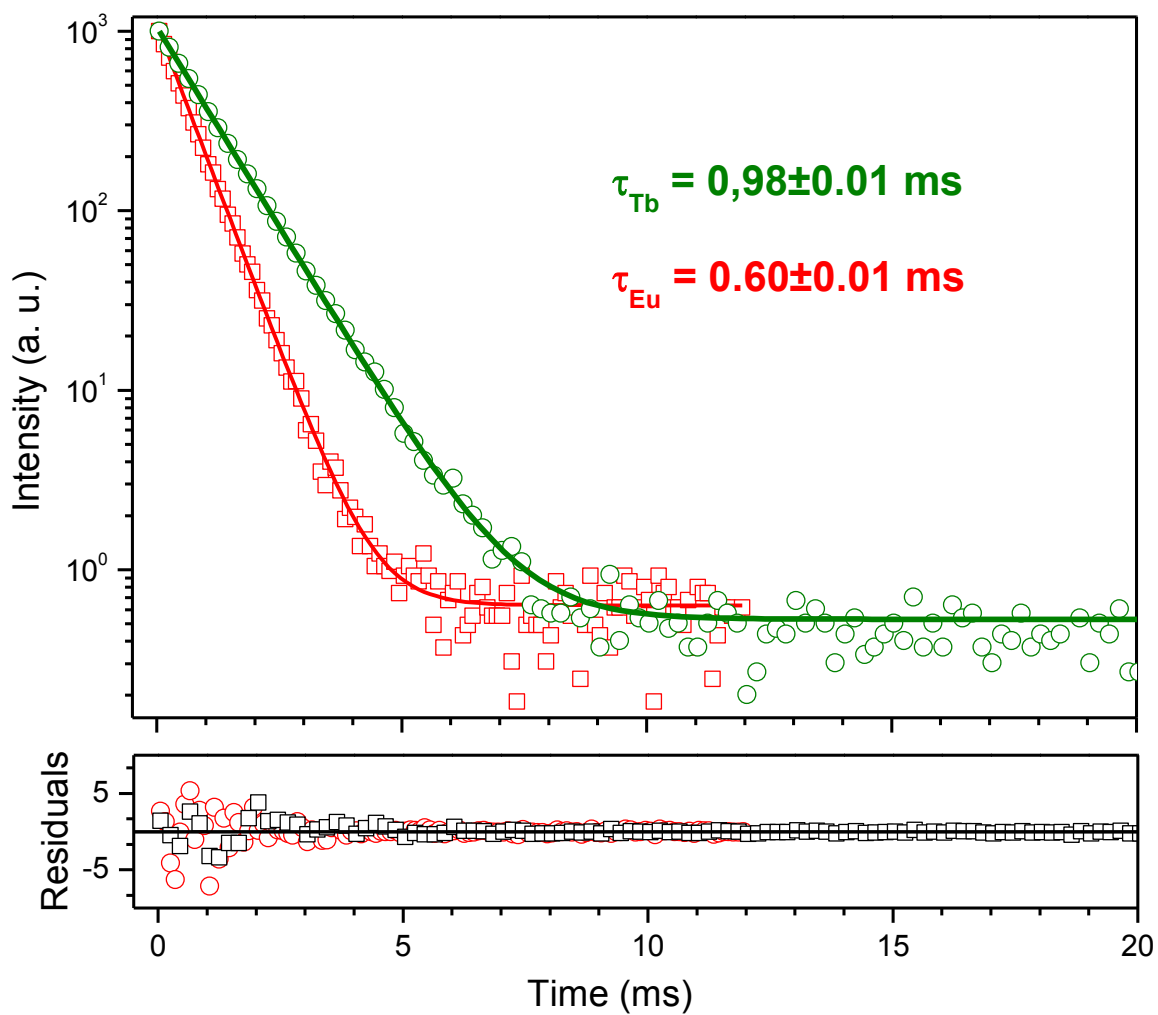

**Figure S9:**  $^5D_0$  and  $^5D_4$  decay curves of  $[\text{Eu}(\text{L})(\text{ox})(\text{H}_2\text{O})]$  ( $\lambda_{\text{Exc}} = 395$  nm, red) and  $[\text{Eu}(\text{L})(\text{ox})(\text{H}_2\text{O})]$  ( $\lambda_{\text{Exc}} = 488$  nm, green), measured at 297 K, monitoring the  $\text{Eu}^{3+}$  and  $\text{Tb}^{3+}$  emission at 619.6 nm and 542 nm, respectively, and fitted with single exponential decay functions ( $r^2 > 0.999$ ).

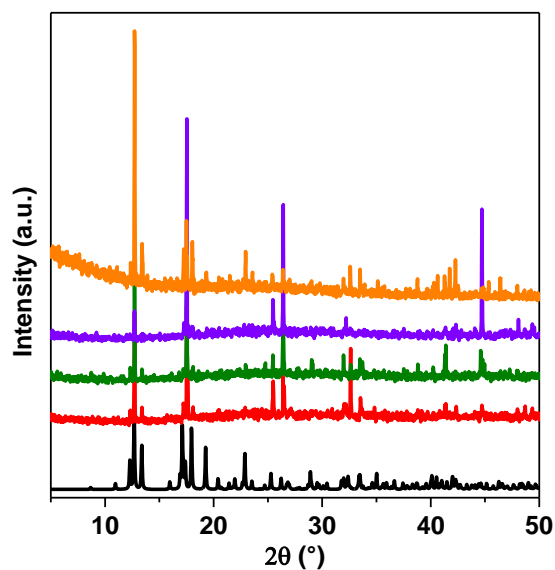

**Figure S10:** Comparison of the experimental powder X-ray diffraction patterns for the compounds  $[\text{Tb}_{1-x}\text{Eu}_x(\text{L})(\text{ox})(\text{H}_2\text{O})]$  with  $x = 0.01$  (red line),  $0.03$  (green line),  $0.05$  (violet line) and  $0.10$  (orange line), and the simulated pattern from single crystals X-ray data of the compound  $[\text{Tb}(\text{L})(\text{ox})(\text{H}_2\text{O})]$  (black line).

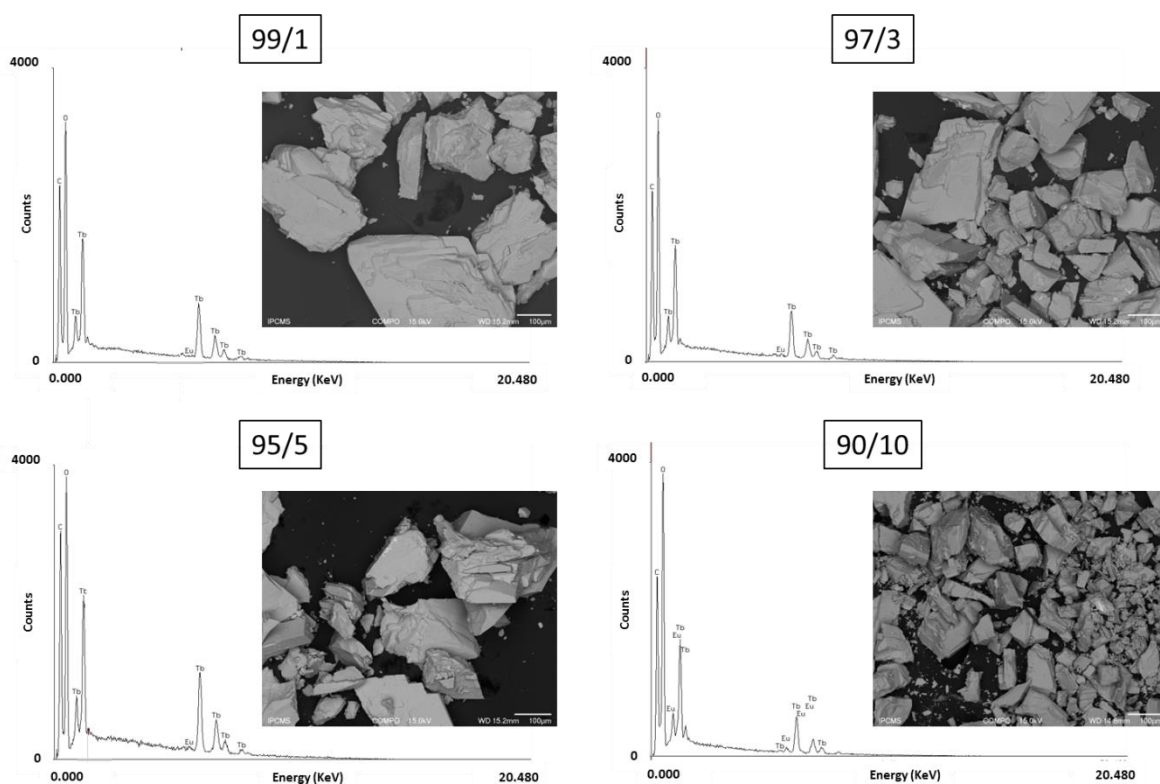

**Figure S11:** SEM images in composition and EDX spectra of the compounds  $[\text{Tb}_{1-x}\text{Eu}_x(\text{L})_2(\text{ox})(\text{H}_2\text{O})]$  with  $x = 0.01, 0.03, 0.05$  and  $0.10$ .

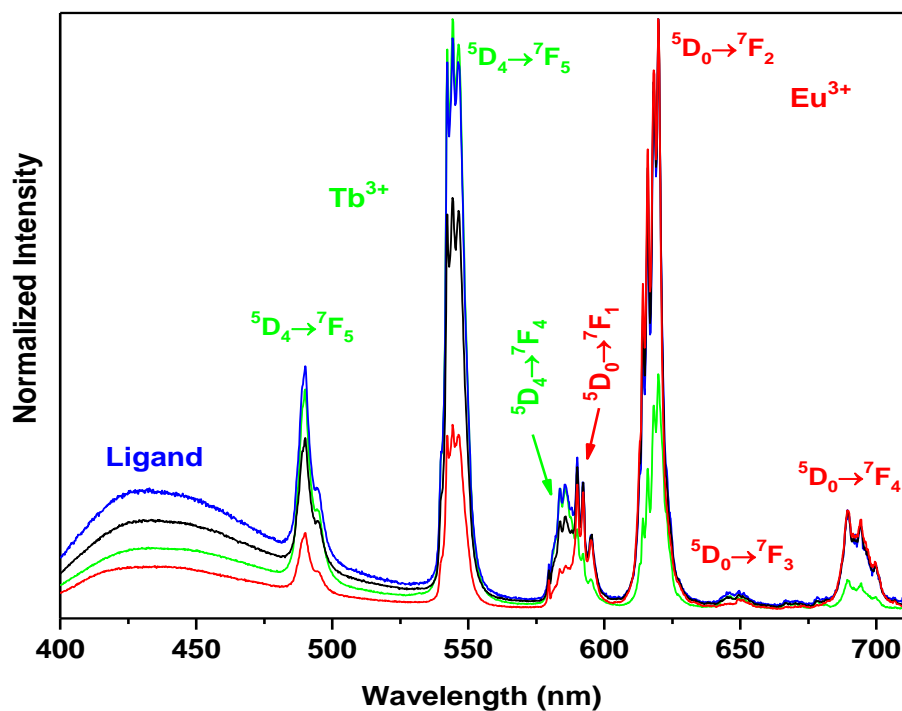

**Figure S12:** Room-temperature emission spectra of  $[\text{Tb}_{1-x}\text{Eu}_x(\text{L})_2(\text{ox})(\text{H}_2\text{O})]$  with the excitation fixed at 364 nm, for  $x = 0.01$  (green line), 0.03 (blue line), 0.05 (black line) and 0.10 (red line).

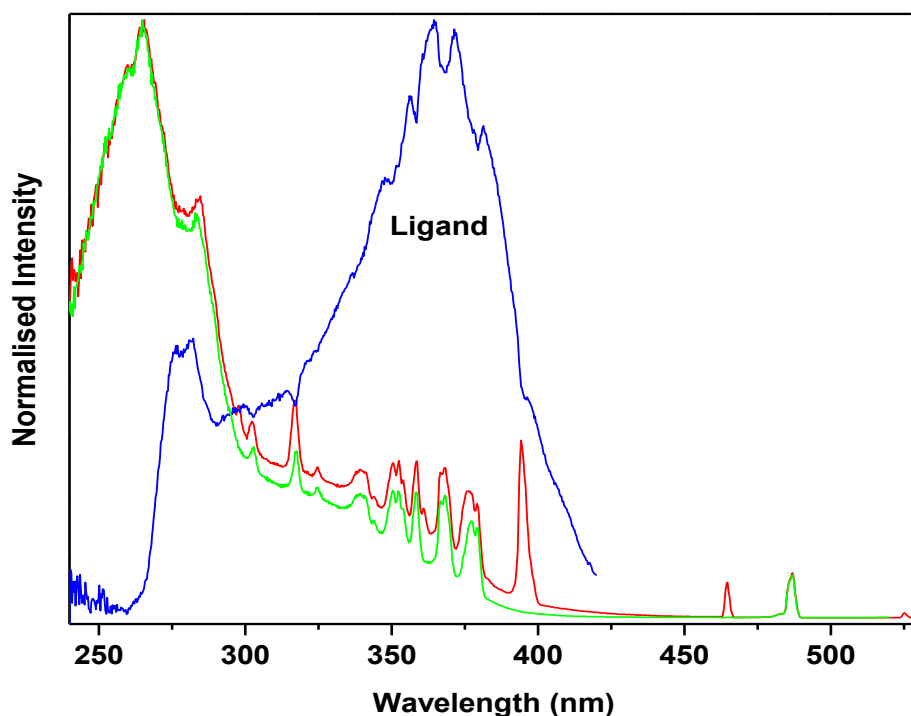

**Figure S13:** Excitation spectra of  $[\text{Tb}_{0.90}\text{Eu}_{0.10}(\text{L})_2(\text{ox})(\text{H}_2\text{O})]$  recorded at 12 K detecting the emissions of  $\text{Eu}^{3+}$  at 620 nm (red line),  $\text{Tb}^{3+}$  at 542 nm (green line) and of the ligand at 450 nm (blue line).

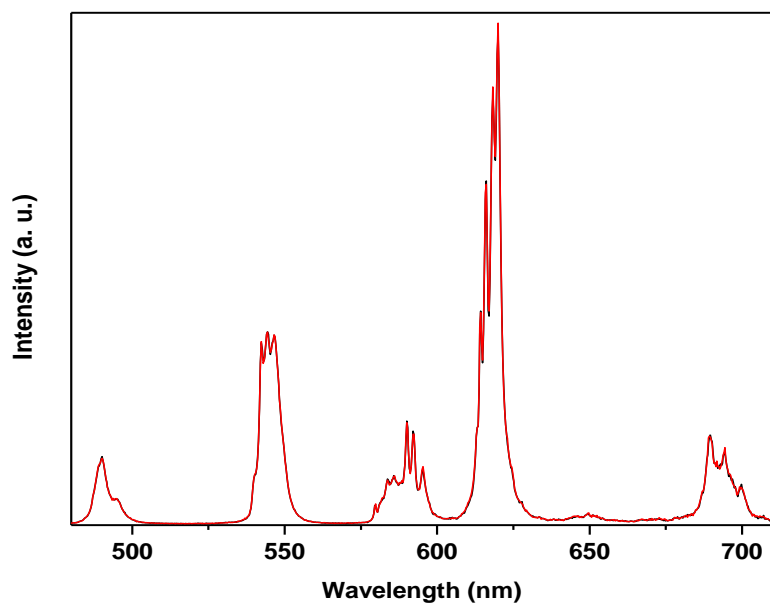

**Figure S14:** Room-temperature emission spectra of  $[\text{Tb}_{0.90}\text{Eu}_{0.10}(\text{L})_2(\text{ox})(\text{H}_2\text{O})]$  under ambient pressure (1 bar; black line) and in high vacuum ( $5 \times 10^{-3}$  mbar; red line) measured with 285 nm excitation.

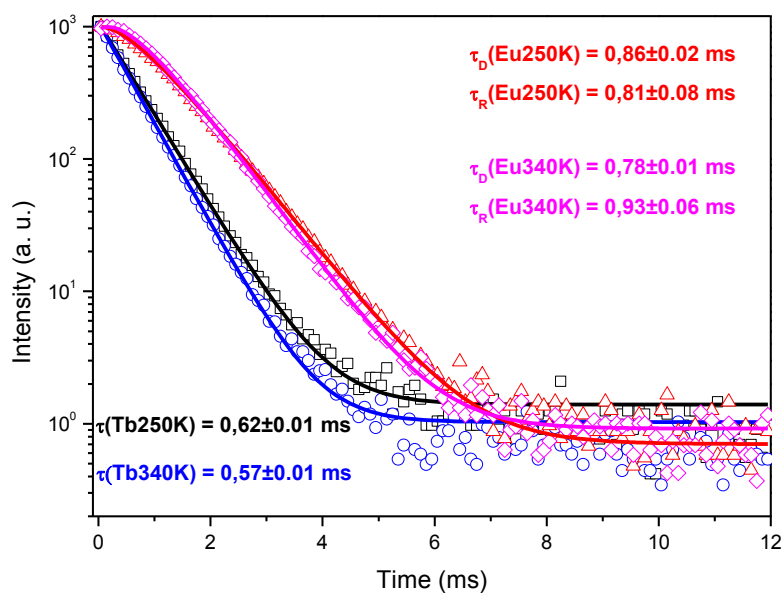

**Figure S15:** 250 K and 340 K lifetime decay curves of  $[\text{Tb}_{0.90}\text{Eu}_{0.10}(\text{L})_2(\text{ox})(\text{H}_2\text{O})]$  ( $\lambda_{\text{Exc}} = 364$  nm) measured monitoring the  $\text{Eu}^{3+}$  and  $\text{Tb}^{3+}$  emission at 619.6 nm and 542 nm, respectively.  $\text{Tb}^{3+} {}^5\text{D}_4$  decay curves were fitted with single exponential decay functions ( $r^2 > 0.999$ ), whereas the  $\text{Eu}^{3+}$  decay curves were fitted with the equation  $I = [I_0 + I_1(1 - \exp(-t/\tau_r))] \exp(-t/\tau_d) + I_c$ , where  $I$  and  $I_0$  are the intensities of the emitting level at time  $t$  and  $t = 0$ ,  $\tau_r$ , is the rise-time of the emitting lower-level,  $\tau_d$  is the decay time of the emitting level and  $I_c$  is the background constant.

## Expressions used for the analysis of the magnetic data:

### E1

$$\chi = \frac{N\beta^2}{3kTx} *$$

$$\frac{24 + (13.5x - 1.5) \exp(-x) + (67.5x - 2.5) \exp(-3x) + (189x - 3.5) \exp(-6x) + (405x - 4.5) \exp(-10x) + (742.5x - 5.5) \exp(-15x) + (1228.5x - 6.5) \exp(-21x)}{1 + 3 \exp(-x) + 5 \exp(-3x) + 7 \exp(-6x) + 9 \exp(-10x) + 11 \exp(-15x) + 13 \exp(-21x)}$$

with  $N$  is the Avogadro number,  $\beta$  the Bohr magneton,  $k$  the Boltzmann constant and  $\lambda$  the coupling constant and  $x = \frac{\lambda}{kT}$ .

### E2

$$\chi =$$

$$\frac{Ng^2\beta^2}{kT} *$$

$$\frac{0.5 \exp\left(\frac{-0.25\Delta}{kT}\right) + 4.5 \exp\left(\frac{-2.25\Delta}{kT}\right) + 12.5 \exp\left(\frac{-6.25\Delta}{kT}\right) + 24.5 \exp\left(\frac{-12.25\Delta}{kT}\right) + 40.5 \exp\left(\frac{-20.25\Delta}{kT}\right) + 60.5 \exp\left(\frac{-30.25\Delta}{kT}\right) + 84.5 \exp\left(\frac{-42.25\Delta}{kT}\right) + 112.5 \exp\left(\frac{-56.25\Delta}{kT}\right)}{1 + 2 \exp\left(\frac{-0.25\Delta}{kT}\right) + 2 \exp\left(\frac{-2.25\Delta}{kT}\right) + 2 \exp\left(\frac{-6.25\Delta}{kT}\right) + 2 \exp\left(\frac{-12.25\Delta}{kT}\right) + 2 \exp\left(\frac{-20.25\Delta}{kT}\right) + 2 \exp\left(\frac{-30.25\Delta}{kT}\right) + 2 \exp\left(\frac{-42.25\Delta}{kT}\right) + 2 \exp\left(\frac{-56.25\Delta}{kT}\right)}$$

### E3

$$\chi = \frac{Ng^2\beta^2}{kT} * \frac{2 \exp\left(\frac{-\Delta}{kT}\right) + 8 \exp\left(\frac{-4\Delta}{kT}\right) + 18 \exp\left(\frac{-9\Delta}{kT}\right) + 32 \exp\left(\frac{-16\Delta}{kT}\right) + 50 \exp\left(\frac{-25\Delta}{kT}\right) + 72 \exp\left(\frac{-36\Delta}{kT}\right) + 98 \exp\left(\frac{-49\Delta}{kT}\right) + 128 \exp\left(\frac{-64\Delta}{kT}\right)}{1 + 2 \exp\left(\frac{-\Delta}{kT}\right) + 2 \exp\left(\frac{-4\Delta}{kT}\right) + 2 \exp\left(\frac{-9\Delta}{kT}\right) + 2 \exp\left(\frac{-16\Delta}{kT}\right) + 2 \exp\left(\frac{-25\Delta}{kT}\right) + 2 \exp\left(\frac{-36\Delta}{kT}\right) + 2 \exp\left(\frac{-49\Delta}{kT}\right) + 2 \exp\left(\frac{-64\Delta}{kT}\right)}$$

### E4

$$\chi = \frac{Ng^2\beta^2}{kT} * \frac{0.5 \exp\left(\frac{-0.25\Delta}{kT}\right) + 4.5 \exp\left(\frac{-2.25\Delta}{kT}\right) + 12.5 \exp\left(\frac{-6.25\Delta}{kT}\right) + 24.5 \exp\left(\frac{-12.25\Delta}{kT}\right)}{2 \exp\left(\frac{-0.25\Delta}{kT}\right) + 2 \exp\left(\frac{-2.25\Delta}{kT}\right) + 2 \exp\left(\frac{-6.25\Delta}{kT}\right) + 2 \exp\left(\frac{-12.25\Delta}{kT}\right)}$$

### E5

$$\chi_m =$$

$$\frac{N\beta^2}{3kTx} *$$

$$\frac{1228.5x - 6.5 + (742.5x - 5.5) \exp(6x) + (405x - 4.5) \exp(11x) + (189x - 3.5) \exp(15x) + (67.5x - 2.5) \exp(18x) + (1.53x - 1.5) \exp(20x) + 6 \exp(21x)}{13 + 11 \exp(6x) + 9 \exp(11x) + 7 \exp(15x) + 5 \exp(18x) + 3 \exp(20x) + \exp(21x)}$$
